# Supplementary material for: The Seasonal Microbial Ecology of Plankton and Plankton-Associated Vibrio parahaemolyticus in the Northeast United States
Source: PubMed Central journal article supplement (PMC8276809; doi:10.1128/aem.02973-20), 2021-07-13
Supplement: aem.02973-20-s0001.pdf [file aem.02973-20-s0001.pdf]

**Table S1.** Range and mean values for *V. parahaemolyticus* (*Vp*), water quality and nutrients by year.

| Variable                                  | Period    | Min   | Max    | Mean and SD    |
|-------------------------------------------|-----------|-------|--------|----------------|
| <i>Vp</i> and Plankton                    |           |       |        |                |
| Phytoplankton <i>Vp</i><br>(MPN/L)        | 2014-2016 | 0.018 | 21     | 1.7 ± 4        |
|                                           | 2014      | 0.018 | 21     | 4.6 ± 7.5      |
|                                           | 2015      | 0.018 | 10.8   | 1.8 ± 3.4      |
|                                           | 2016      | 0.018 | 11.7   | 3.2 ± 1.5      |
| Zooplankton <i>Vp</i><br>(MPN/L)          | 2014-2016 | 0.018 | 14     | 8.5 ± 2.6      |
|                                           | 2014      | 0.018 | 4.1    | 1.6 ± 1.5      |
|                                           | 2015      | 0.018 | 1      | 0.2 ± 0.3      |
|                                           | 2016      | 0.018 | 14.3   | 1.1 ± 3.7      |
| Phytoplankton<br>Abundance (n/L)          | 2014-2016 | 62    | 35,630 | 6474 ± 10,980  |
|                                           | 2014      | 62    | 35,598 | 9,038 ± 15,988 |
|                                           | 2015      | 119   | 31,775 | 6726 ± 10,055  |
|                                           | 2016      | 89    | 35,630 | 4986 ± 9,124   |
| Zooplankton<br>Abundance (n/L)            | 2014-2016 | 0     | 3,350  | 227 ± 381      |
|                                           | 2014      | 7     | 308    | 113            |
|                                           | 2015      | 6     | 3,350  | 445            |
|                                           | 2016      | 3     | 322    | 107            |
| Water Quality                             |           |       |        |                |
| DON (mg/L)                                | 2014-2016 | 0     | 0.2    | 0.12 ± 0.05    |
|                                           | 2014      | 0.13  | 0.19   | 0.16 ± 0.02    |
|                                           | 2015      | 0.01  | 0.19   | 0.14 ± 0.05    |
|                                           | 2016      | 0     | 0.15   | 0.11 ± 0.04    |
| NH <sub>4</sub> (mgN/L)                   | 2014-2016 | 0     | 0.1    | 0.02 ± 0.02    |
|                                           | 2014      | 0.01  | 0.04   | 0.02 ± 0.01    |
|                                           | 2015      | 0     | 0.04   | 0.01 ± 0.01    |
|                                           | 2016      | 0     | 0.07   | 0.03 ± 0.02    |
| NO <sub>3</sub> + NO <sub>2</sub> (mgN/L) | 2014-2016 | 0.01  | 0.2    | 0.04 ± 0.04    |
|                                           | 2014      | 0.01  | 0.09   | 0.03 ± 0.04    |
|                                           | 2015      | 0.01  | 0.1    | 0.04 ± 0.03    |
|                                           | 2016      | 0.01  | 0.2    | 0.05 ± 0.05    |
| NPOC (mg/L)                               | 2014-2016 | 0.36  | 3.8    | 2.31 ± 0.7     |
|                                           | 2014      | 1.85  | 3.22   | 2.6 ± 0.6      |
|                                           | 2015      | 0.36  | 3.14   | 2.4 ± 0.7      |
|                                           | 2016      | 1.07  | 3.8    | 2.2 ± 0.7      |
| PC (mg/L)                                 | 2014-2016 | 0.43  | 3.6    | 1.16 ± 0.7     |
|                                           | 2014      | 0.43  | 1.73   | 1.14 ± 0.6     |
|                                           | 2015      | 0.44  | 3.63   | 1.23 ± 0.9     |
|                                           | 2016      | 0.49  | 2.77   | 1.11 ± 0.6     |
| PN (mg/L)                                 | 2014-2016 | 0.05  | 0.5    | 0.17 ± 0.1     |

|                              |           |       |       |             |
|------------------------------|-----------|-------|-------|-------------|
|                              | 2014      | 0.06  | 0.24  | 0.15 ± 0.01 |
|                              | 2015      | 0.05  | 0.44  | 0.18 ± 0.12 |
|                              | 2016      | 0.06  | 0.49  | 0.17 ± 0.12 |
| PO <sub>4</sub> (mgP/L)      | 2014-2016 | 0     | 0.07  | 0.03 ± 0.02 |
|                              | 2014      | 0.01  | 0.04  | 0.03 ± 0.01 |
|                              | 2015      | 0.01  | 0.07  | 0.03 ± 0.02 |
|                              | 2016      | 0     | 0.05  | 0.03 ± 0.02 |
| TDN (mg/L)                   | 2014-2016 | 0.06  | 0.34  | 0.18 ± 0.06 |
|                              | 2014      | 0.16  | 0.26  | 0.21 ± 0.04 |
|                              | 2015      | 0.06  | 0.28  | 0.19 ± 0.05 |
|                              | 2016      | 0.07  | 0.34  | 0.17 ± 0.07 |
| Chlorophyll- <i>a</i> (µg/L) | 2014-2016 | 1.3   | 22.6  | 6.3 ± 4.5   |
|                              | 2014      | 2.04  | 8.38  | 5.9 ± 2.4   |
|                              | 2015      | 2.26  | 22.55 | 7.1 ± 6.1   |
|                              | 2016      | 1.31  | 14.48 | 5.9 ± 3.8   |
| Dissolved Oxygen (mg/L)      | 2014-2016 | 6.5   | 11.5  | 8.5 ± 1.3   |
|                              | 2014      | 6.24  | 12.31 | 8.5 ± 1.2   |
|                              | 2015      | 6.6   | 11.31 | 8.4 ± 1.1   |
|                              | 2016      | 6.36  | 12.74 | 8.5 ± 1.4   |
| pH                           | 2014-2016 | 7.5   | 8     | 7.8 ± 0.15  |
|                              | 2014      | 7.37  | 8.35  | 7.8 ± 0.19  |
|                              | 2015      | 7.4   | 8.06  | 7.8 ± 0.15  |
|                              | 2016      | 7.62  | 8.2   | 7.9 ± 0.11  |
| Pheophytin (µg/L)            | 2014-2016 | 0.7   | 9.8   | 2.9 ± 2.2   |
|                              | 2014      | 1.58  | 5     | 2.8 ± 1.4   |
|                              | 2015      | 0.66  | 9.83  | 3.5 ± 2.9   |
|                              | 2016      | 0.71  | 7.76  | 2.6 ± 1.8   |
| Salinity (ppt)               | 2014-2016 | 14.1  | 32.1  | 27.1 ± 3.5  |
|                              | 2014      | 17.79 | 31.76 | 26.2 ± 3.3  |
|                              | 2015      | 14.11 | 31.29 | 27.1 ± 3.5  |
|                              | 2016      | 18.2  | 32.09 | 27.9 ± 3.5  |
| Water temperature (°C)       | 2014-2016 | 6.3   | 25.3  | 17.7 ± 5.1  |
|                              | 2014      | 3.52  | 26.97 | 15.3 ± 5.5  |
|                              | 2015      | 5.79  | 23.48 | 16.2 ± 5.3  |
|                              | 2016      | 5.39  | 24.04 | 15.6 ± 5.5  |
| Total suspended solids       | 2014-2016 | 10.7  | 76.4  | 29.8 ± 15.6 |
|                              | 2014      | 10.71 | 33.57 | 19.2 ± 10.9 |
|                              | 2015      | 13.33 | 76.43 | 29.6 ± 17.6 |
|                              | 2016      | 11.06 | 69.76 | 32 ± 15     |
| Turbidity (NTU)              | 2014-2016 | 1.15  | 16.4  | 10.8 ± 13.3 |
|                              | 2014      | 0.92  | 2.73  | 1.6 ± 0.7   |
|                              | 2015      | 1.71  | 3.8   | 2.5 ± 0.8   |

---

**Figure S1.** *V. parahaemolyticus*, plankton species and environmental variables by time with peak timing and confidence intervals.

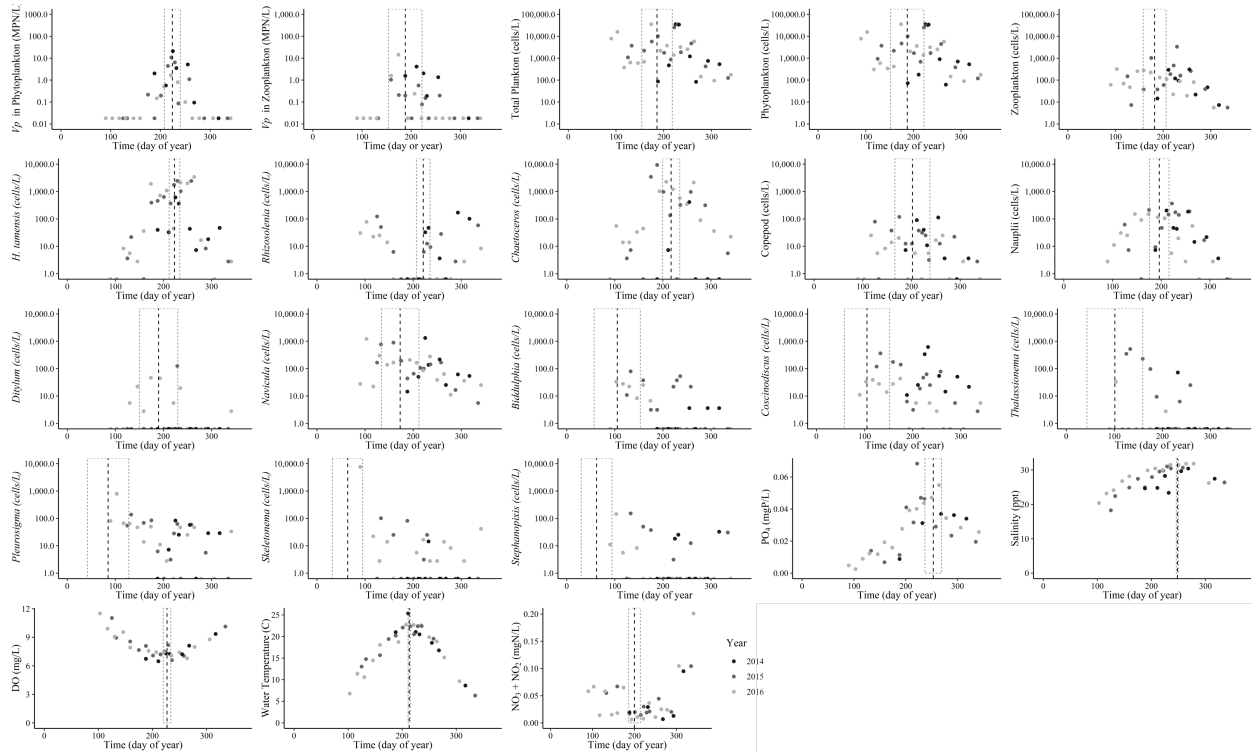

**Figure S2.** Environmental variables with limited seasonal periodicity.

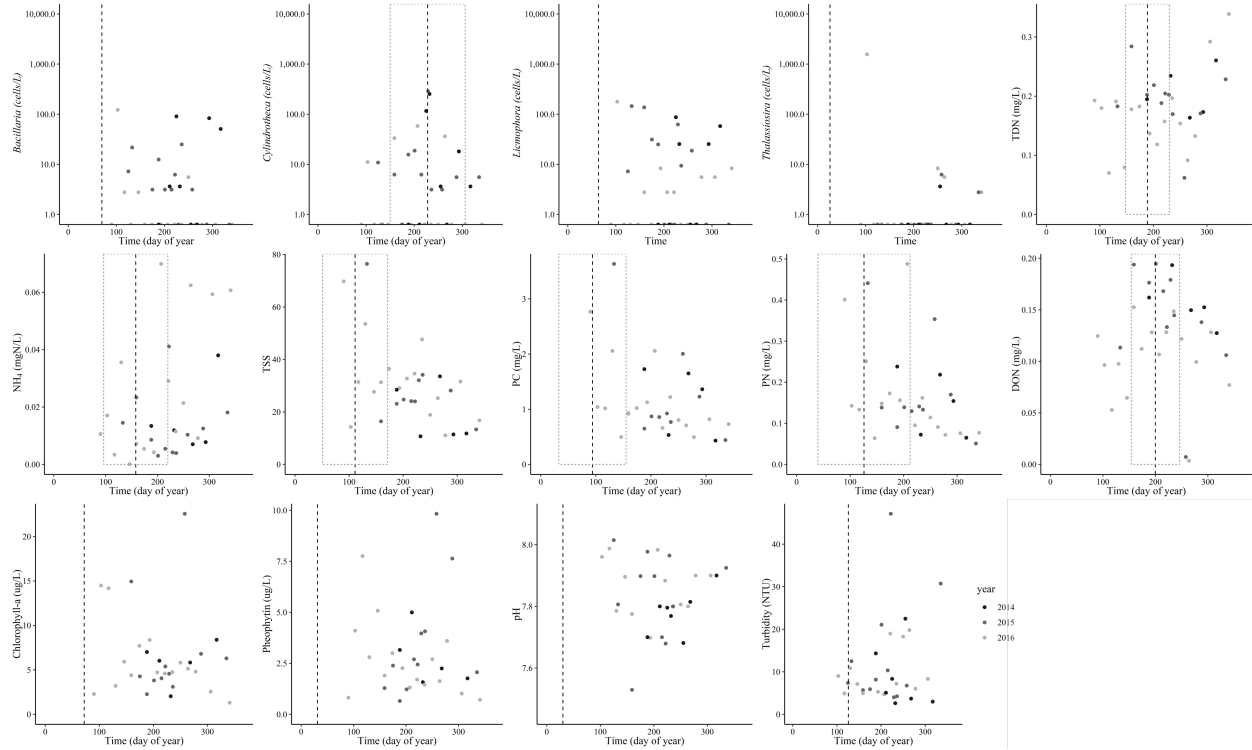

**Table S2.** Environmental variables showing little evidence of seasonality. Model 1 (top) and Model 2 (bottom)

|                      | Coefficient |             | Standard Error |             | r <sup>2</sup> | Deviance Explained | AIC    | Peak Timing |
|----------------------|-------------|-------------|----------------|-------------|----------------|--------------------|--------|-------------|
|                      | trend       | seasonality | trend          | seasonality |                |                    |        |             |
| <i>Bacillaria</i>    | -0.001*     | 0.02        | <0.001         | 0.13        | 0.08           | 0.13               | 129.26 |             |
|                      | -0.002*     | 0.47 0.19   | <0.001         | 0.36 0.44   | 0.1            | 0.18               | 129.36 | 70 ± 88     |
| <i>Cylindrotheca</i> | -0.002      | 0.05        | 0.001          | 0.17        | 0.02           | 0.07               | 146.57 |             |
|                      | -0.001      | -0.45 -0.45 | 0.001          | 0.46 0.56   | 0.02           | 0.1                | 147.31 | 228 ± 78    |
| <i>Licmophora</i>    | -0.001      | 0.02        | 0.001          | 0.17        | 0.01           | 0.04               | 149.67 |             |
|                      | -0.002      | 0.52 0.26   | 0.001          | 0.48 0.59   | 0.01           | 0.08               | 150.39 | 64 ± 102    |
| <i>Thalassiosira</i> | <0.001      | -0.15       | 0.001          | 0.13        | 0.02           | 0.07               | 128.04 |             |
|                      | <0.001      | 0.34 0.70   | 0.001          | 0.36 0.44   | 0.02           | 0.11               | 128.55 | 26 ± 47     |
| <i>Tintinnida</i>    | <0.001      | 0.45        | 0.001          | 0.2         | 0.08           | 0.13               | 160.55 |             |
|                      | <0.001      | 0.57 -1.21  | 0.001          | 0.57 0.70   | 0.067          | 0.14               | 161.95 | 157 ± 56    |
| DON                  | <0.001**    | <0.01       | <0.001         | <0.001      | 0.26           | 0.31               | 104.87 |             |
|                      | <0.001**    | -0.008; -   |                |             |                |                    |        |             |
|                      | *           | 0.03*       | <0.001         | 0.01 0.01   | 0.27           | 0.34               | 102.12 | 200 ± 45    |
| NPOC                 | -0.001      | -0.02       | <0.001         | 0.07        | 0.03           | 0.10               | 73.3   |             |

|            |          |            |        |           |       |      |        |           |
|------------|----------|------------|--------|-----------|-------|------|--------|-----------|
|            | -0.001   | 0.32 0.23  | <0.001 | 0.20 0.23 | 0.09  | 0.18 | 72.24  | 55 ± 56   |
| TDN        | <0.001   | -0.01      | <0.001 | <0.001    | 0.11  | 0.17 | 82.39  |           |
|            |          | <0.001     |        | <0.001    |       |      |        |           |
|            | <0.001   | <0.001**   | <0.001 | <0.001    | 0.09  | 0.18 | 81.07  | 189 ± 41  |
| NH4        | <0.001   | <0.001*    | <0.001 | <0.001    | 0.20  | 0.24 | 156.49 |           |
|            |          | <0.001     |        | <0.001    |       |      |        |           |
|            | <0.001*  | <0.001     | <0.001 | <0.001    | 0.16  | 0.24 | 15.82  | 158 ± 62  |
| TSS        | 0.008    | 2.46       | 0.01   | 1.51      | 0.03  | 0.10 | 253.48 |           |
|            | 0.005    | 9.22 -3.31 | 0.01   | 4.22 4.89 | 0.12  | 0.21 | 251.54 | 111 ± 60  |
| PC         | -0.0003  | 0.08       | 0.0005 | 0.07      | 0.006 | 0.06 | 71.61  |           |
|            | -0.0005  | 0.44 -0.02 | 0.0005 | 0.20 0.24 | 0.09  | 0.19 | 69.19  | 94 ± 61   |
| PN         | <0.001   | 0.02       | <0.001 | 0.001     | 0.02  | 0.08 | 40.66  |           |
|            |          | <0.001     |        | <0.001    |       |      |        |           |
|            | <0.001   | <0.001     | <0.001 | <0.001    | 0.02  | 0.13 | 40.08  | 126 ± 86  |
|            | <0.001** |            |        |           |       |      |        |           |
| DON        | *        | <0.001     | <0.001 | <0.001    | 0.20  | 0.31 | 104.87 |           |
|            |          | <0.001     |        | <0.001    |       |      |        |           |
|            | <0.001   | <0.001     | <0.001 | <0.001    | 0.26  | 0.33 | 103.93 | 200 ± 46  |
| CHL        | -0.001   | 0.08       | 0.003  | 0.45      | 0.06  | 0.01 | 193.56 |           |
|            | -0.002   | 1.44 0.48  | 0.003  | 1.37 1.53 | 0.06  | 0.04 | 194.43 | 72 ± 107  |
| Pheophytin | <0.001   | -0.02      | 0.001  | 0.22      | 0.06  | 0.01 | 146.72 |           |
|            | <0.001   | 0.06 0.11  | 0.002  | 0.67 0.75 | 0.09  | 0.01 | 148.7  | 31 ± 200  |
| pH         | <0.001   | -0.01      | <0.001 | 0.01      | 0.05  | 0.11 | 46.66  |           |
|            |          | <0.001     |        | <0.001    |       |      |        |           |
|            | <0.001   | <0.001     | <0.001 | <0.001    | 0.10  | 0.19 | 47.64  | 30 ± 36   |
| Turbidity  | <0.001   | -0.93      | 0.006  | 1.03      | 0.04  | 0.03 | 247.21 |           |
|            | 0.001    | -2.27 1.39 | 0.006  | 2.80 3.70 | 0.06  | 0.04 | 248.83 | 126 ± 166 |

significance of coefficients indicated as \*\*\* 0.001, \*\* 0.01, \* 0.1
